# Supplementary material
Source: publisher figshare collection journal article supplement (https://acs.figshare.com/ndownloader/files/4207816)
Supplement: Supplementary file 1 [file 4207816]

#-----------------------------------------------------------------------------80
#     Subsequently are contained the CIF's of two structures
#     1 = compound (2)
#     2 = compound (4)
#     separated by #===END
#-----------------------------------------------------------------------------80


data_global

_publ_contact_author
;
  Dr. Enrique O\~nate Rodr\'iguez
  Departamento de Qu\'imica Inorg\'anica - I.C.M.A.
  Facultad de Ciencias
  Universidad de Zaragoza - C.S.I.C.
  50009 Zaragoza, Spain
;
_publ_contact_author_email        enriqueo@posta.unizar.es

#-----------------------------------------------------------------------------80
#Publication details

loop_
_publ_author_name
                     'Esteruelas, M. A.'
                     'L'opez, A. M.'
                     'Mozo, S.'
                     'O\~nate, E.'
                     
 _publ_requested_journal		'Organometallics'
 _journal_name_full
; 
  Organometallics
;
_publ_section_title
;
Formation of Osmium-Allylphosphinomethanide Complexes by Coupling
 of an Isopropenyldiisopropylphosphine and Monosubstituted Allenes
;
_publ_contact_letter              
;
Oct ##, 2011
Please consider this CIF submission as supplementary material of
the structures contained in the paper: 

Formation of Osmium-Allylphosphinomethanide Complexes by Coupling
 of an Isopropenyldiisopropylphosphine and Monosubstituted Allenes

that is submitted to Organometallics for publication. 
;
_journal_volume      ?
_journal_page_first  ?
_journal_page_last   ?
_journal_year        ?
                     


#-----------------------------------------------------------------------------80
# Data for compound 2 (local labelling silvias) 
  
 
data_silvias 
 

_chemical_name_systematic 
; 
 ? 
; 
_chemical_name_common             ? 
_chemical_melting_point           ? 
_chemical_formula_moiety          ? 
_chemical_formula_sum 
 'C23 H38 F6 Os P2' 
_chemical_formula_weight          680.67 
 
loop_ 
 _atom_type_symbol 
 _atom_type_description 
 _atom_type_scat_dispersion_real 
 _atom_type_scat_dispersion_imag 
 _atom_type_scat_source 
 'C'  'C'   0.0033   0.0016 
 'International Tables Vol C Tables 4.2.6.8 and 6.1.1.4' 
 'H'  'H'   0.0000   0.0000 
 'International Tables Vol C Tables 4.2.6.8 and 6.1.1.4' 
 'F'  'F'   0.0171   0.0103 
 'International Tables Vol C Tables 4.2.6.8 and 6.1.1.4' 
 'P'  'P'   0.1023   0.0942 
 'International Tables Vol C Tables 4.2.6.8 and 6.1.1.4' 
 'Os'  'Os'  -1.2165   7.6030 
 'International Tables Vol C Tables 4.2.6.8 and 6.1.1.4' 
 
_symmetry_space_group_name_H-M 'P b c a'
_symmetry_cell_setting orthorhombic 
 
loop_ 
 _symmetry_equiv_pos_as_xyz 
 'x, y, z' 
 '-x+1/2, -y, z+1/2' 
 '-x, y+1/2, -z+1/2' 
 'x+1/2, -y+1/2, -z' 
 '-x, -y, -z' 
 'x-1/2, y, -z-1/2' 
 'x, -y-1/2, z-1/2' 
 '-x-1/2, y-1/2, z' 
 
_cell_length_a                    17.5094(2) 
_cell_length_b                    15.9826(2) 
_cell_length_c                    18.3110(2) 
_cell_angle_alpha                 90.00 
_cell_angle_beta                  90.00 
_cell_angle_gamma                 90.00 
_cell_volume                      5124.25(10) 
_cell_formula_units_Z             8 
_cell_measurement_reflns_used   21129
_cell_measurement_theta_min     3.1746
_cell_measurement_theta_max     27.9088
 
_cell_measurement_temperature   150(2)
_exptl_crystal_description                plate
_exptl_crystal_colour                     colourless
_exptl_crystal_size_max                   0.22
_exptl_crystal_size_mid                   0.22
_exptl_crystal_size_min                   0.06
_exptl_crystal_density_meas       ? 
_exptl_crystal_density_diffrn     1.765 
_exptl_crystal_density_method     'not measured' 
_exptl_crystal_F_000              2688 
_exptl_absorpt_coefficient_mu     5.155 
_exptl_absorpt_correction_T_min                   0.7811
_exptl_absorpt_correction_T_max                   1.1333
_exptl_absorpt_correction_type            'multi-scan'
_exptl_absorpt_process_details
;
CrysAlis RED, Oxford Diffraction Ltd.,
Version 1.171.32.19 (release 28-02-2008 CrysAlis171 .NET)
(compiled Feb 28 2008,12:10:31)
Empirical absorption correction using spherical harmonics,
 implemented in SCALE3 ABSPACK scaling algorithm.
;
 
_diffrn_radiation_wavelength 0.7107
_diffrn_radiation_type 'Mo K\a'
_diffrn_radiation_source 'Enhance (Mo) X-ray Source'
_diffrn_radiation_monochromator 'graphite'
_diffrn_detector_area_resol_mean 16.3990
_diffrn_reflns_number             93742 
_diffrn_reflns_av_R_equivalents   0.0865 
_diffrn_reflns_av_sigmaI/netI     0.0767 
_diffrn_reflns_limit_h_min        -22 
_diffrn_reflns_limit_h_max        22 
_diffrn_reflns_limit_k_min        -19 
_diffrn_reflns_limit_k_max        21 
_diffrn_reflns_limit_l_min        -21 
_diffrn_reflns_limit_l_max        24 
_diffrn_reflns_theta_min          2.65 
_diffrn_reflns_theta_max          28.89
_diffrn_ambient_temperature           150(2)
 
_reflns_number_total              6215 
_reflns_number_gt                 3707 
_reflns_threshold_expression      >2sigma(I) 
 
_audit_creation_method
;
CrysAlis RED, Oxford Diffraction Ltd.,
Version 1.171.32.19 (release 28-02-2008 CrysAlis171 .NET)
(compiled Feb 28 2008,12:10:31)
;
_computing_data_collection
;
CrysAlis CCD, Oxford Diffraction Ltd.,
Version 1.171.32.19 (release 28-02-2008 CrysAlis171 .NET)
(compiled Feb 28 2008,12:10:31)
;
_computing_cell_refinement
;
CrysAlis RED, Oxford Diffraction Ltd.,
Version 1.171.32.19 (release 28-02-2008 CrysAlis171 .NET)
(compiled Feb 28 2008,12:10:31)
;
_computing_data_reduction
;
CrysAlis RED, Oxford Diffraction Ltd.,
Version 1.171.32.19 (release 28-02-2008 CrysAlis171 .NET)
(compiled Feb 28 2008,12:10:31)
;
_computing_structure_solution     'SHELXS-97 (Sheldrick, 1990)' 
_computing_structure_refinement   'SHELXL-97 (Sheldrick, 1997)' 
_computing_molecular_graphics     ? 
_computing_publication_material   ? 
 
_refine_special_details 
; 
 Refinement of F^2^ against ALL reflections.  The weighted R-factor wR and 
 goodness of fit S are based on F^2^, conventional R-factors R are based 
 on F, with F set to zero for negative F^2^. The threshold expression of 
 F^2^ > 2sigma(F^2^) is used only for calculating R-factors(gt) etc. and is 
 not relevant to the choice of reflections for refinement.  R-factors based 
 on F^2^ are statistically about twice as large as those based on F, and R- 
 factors based on ALL data will be even larger. 
; 
 
_refine_ls_structure_factor_coef  Fsqd  
_refine_ls_matrix_type            full 
_refine_ls_weighting_scheme       calc  
_refine_ls_weighting_details 
 'calc w=1/[\s^2^(Fo^2^)+(0.0401P)^2^+0.0000P] where P=(Fo^2^+2Fc^2^)/3' 
_atom_sites_solution_primary      direct 
_atom_sites_solution_secondary    difmap 
_atom_sites_solution_hydrogens    geom 
_refine_ls_hydrogen_treatment     mixed 
_refine_ls_extinction_method      none 
_refine_ls_extinction_coef        ? 
_refine_ls_number_reflns          6215 
_refine_ls_number_parameters      309 
_refine_ls_number_restraints      0 
_refine_ls_R_factor_all           0.0786 
_refine_ls_R_factor_gt            0.0351 
_refine_ls_wR_factor_ref          0.0836 
_refine_ls_wR_factor_gt           0.0781 
_refine_ls_goodness_of_fit_ref    0.981 
_refine_ls_restrained_S_all       0.981 
_refine_ls_shift/su_max           0.001 
_refine_ls_shift/su_mean          0.000 
 
loop_ 
 _atom_site_label 
 _atom_site_type_symbol 
 _atom_site_fract_x 
 _atom_site_fract_y 
 _atom_site_fract_z 
 _atom_site_U_iso_or_equiv 
 _atom_site_adp_type 
 _atom_site_occupancy 
 _atom_site_symmetry_multiplicity 
 _atom_site_calc_flag 
 _atom_site_refinement_flags 
 _atom_site_disorder_assembly 
 _atom_site_disorder_group 
Os Os 0.158505(11) 0.364817(12) 0.402464(11) 0.02040(7) Uani 1 1 d . . . 
P1 P 0.14604(8) 0.24643(9) 0.47308(8) 0.0234(3) Uani 1 1 d . . . 
P2 P 0.13430(9) 0.60758(10) 0.17220(10) 0.0336(4) Uani 1 1 d . . . 
F1 F 0.0480(2) 0.6281(3) 0.1639(3) 0.0768(15) Uani 1 1 d . . . 
F2 F 0.2221(2) 0.5867(3) 0.1776(3) 0.0931(18) Uani 1 1 d . . . 
F3 F 0.1173(2) 0.5098(2) 0.1674(3) 0.0718(13) Uani 1 1 d . . . 
F4 F 0.1541(3) 0.7024(3) 0.1777(4) 0.106(2) Uani 1 1 d . . . 
F5 F 0.1472(3) 0.6107(4) 0.0874(3) 0.0946(17) Uani 1 1 d . . . 
F6 F 0.1235(3) 0.6011(3) 0.2567(2) 0.0918(16) Uani 1 1 d . . . 
C1 C 0.1852(4) 0.3522(4) 0.2862(3) 0.0289(14) Uani 1 1 d . . . 
H1A H 0.175(3) 0.395(4) 0.262(3) 0.035 Uiso 1 1 d . . . 
H1B H 0.235(3) 0.326(3) 0.272(3) 0.035 Uiso 1 1 d . . . 
C2 C 0.1296(3) 0.2913(4) 0.3056(3) 0.0282(13) Uani 1 1 d . . . 
C3 C 0.0585(3) 0.3213(4) 0.3327(3) 0.0258(13) Uani 1 1 d . . . 
H3 H 0.025(3) 0.279(3) 0.357(3) 0.031 Uiso 1 1 d . . . 
C4 C 0.0123(3) 0.3905(3) 0.2979(3) 0.0259(13) Uani 1 1 d . . . 
H4 H 0.0472 0.4359 0.2844 0.031 Uiso 1 1 calc R . . 
C5 C -0.0473(3) 0.4254(4) 0.3492(3) 0.0322(14) Uani 1 1 d . . . 
H5A H -0.0822 0.3812 0.3635 0.039 Uiso 1 1 calc R . . 
H5B H -0.0226 0.4463 0.3930 0.039 Uiso 1 1 calc R . . 
C6 C -0.0916(4) 0.4953(4) 0.3134(4) 0.0495(19) Uani 1 1 d . . . 
H6A H -0.1300 0.5158 0.3471 0.059 Uiso 1 1 calc R . . 
H6B H -0.0572 0.5412 0.3025 0.059 Uiso 1 1 calc R . . 
C7 C -0.1295(4) 0.4668(4) 0.2444(4) 0.052(2) Uani 1 1 d . . . 
H7A H -0.1539 0.5143 0.2210 0.062 Uiso 1 1 calc R . . 
H7B H -0.1690 0.4264 0.2563 0.062 Uiso 1 1 calc R . . 
C8 C -0.0732(4) 0.4272(4) 0.1914(4) 0.0472(19) Uani 1 1 d . . . 
H8A H -0.0394 0.4700 0.1724 0.057 Uiso 1 1 calc R . . 
H8B H -0.1009 0.4032 0.1506 0.057 Uiso 1 1 calc R . . 
C9 C -0.0256(3) 0.3584(4) 0.2291(3) 0.0356(15) Uani 1 1 d . . . 
H9A H -0.0586 0.3117 0.2413 0.043 Uiso 1 1 calc R . . 
H9B H 0.0132 0.3384 0.1956 0.043 Uiso 1 1 calc R . . 
C10 C 0.2055(3) 0.2335(3) 0.3965(3) 0.0262(13) Uani 1 1 d . . . 
C11 C 0.1638(4) 0.2082(4) 0.3280(3) 0.0309(14) Uani 1 1 d . . . 
H11A H 0.126(3) 0.176(4) 0.331(3) 0.037 Uiso 1 1 d . . . 
H11B H 0.196(3) 0.195(4) 0.293(3) 0.037 Uiso 1 1 d . . . 
C12 C 0.2909(3) 0.2216(4) 0.4008(4) 0.0369(15) Uani 1 1 d . . . 
H12A H 0.3027 0.1630 0.3992 0.055 Uiso 1 1 calc R . . 
H12B H 0.3095 0.2449 0.4458 0.055 Uiso 1 1 calc R . . 
H12C H 0.3148 0.2494 0.3604 0.055 Uiso 1 1 calc R . . 
C13 C 0.0574(3) 0.1848(4) 0.4758(3) 0.0310(14) Uani 1 1 d . . . 
H13 H 0.0424 0.1766 0.4247 0.037 Uiso 1 1 calc R . . 
C14 C -0.0083(3) 0.2356(4) 0.5115(4) 0.0454(18) Uani 1 1 d . . . 
H14A H -0.0552 0.2048 0.5075 0.068 Uiso 1 1 calc R . . 
H14B H -0.0136 0.2883 0.4869 0.068 Uiso 1 1 calc R . . 
H14C H 0.0032 0.2451 0.5620 0.068 Uiso 1 1 calc R . . 
C15 C 0.0651(4) 0.0978(4) 0.5079(4) 0.057(2) Uani 1 1 d . . . 
H15A H 0.0837 0.1018 0.5571 0.085 Uiso 1 1 calc R . . 
H15B H 0.1003 0.0657 0.4790 0.085 Uiso 1 1 calc R . . 
H15C H 0.0161 0.0708 0.5079 0.085 Uiso 1 1 calc R . . 
C16 C 0.2006(3) 0.2406(4) 0.5585(3) 0.0314(14) Uani 1 1 d . . . 
H16 H 0.2434 0.2797 0.5530 0.038 Uiso 1 1 calc R . . 
C17 C 0.1535(4) 0.2724(4) 0.6230(3) 0.0446(17) Uani 1 1 d . . . 
H17A H 0.1164 0.2309 0.6364 0.067 Uiso 1 1 calc R . . 
H17B H 0.1278 0.3232 0.6094 0.067 Uiso 1 1 calc R . . 
H17C H 0.1866 0.2831 0.6637 0.067 Uiso 1 1 calc R . . 
C18 C 0.2356(4) 0.1567(4) 0.5756(4) 0.050(2) Uani 1 1 d . . . 
H18A H 0.2690 0.1619 0.6169 0.075 Uiso 1 1 calc R . . 
H18B H 0.2641 0.1373 0.5341 0.075 Uiso 1 1 calc R . . 
H18C H 0.1958 0.1173 0.5867 0.075 Uiso 1 1 calc R . . 
C19 C 0.2476(4) 0.4564(4) 0.4403(4) 0.0378(16) Uani 1 1 d . . . 
H19 H 0.2996 0.4444 0.4393 0.045 Uiso 1 1 calc R . . 
C20 C 0.2057(4) 0.4952(4) 0.3858(4) 0.0418(18) Uani 1 1 d . . . 
H20 H 0.2260 0.5141 0.3418 0.050 Uiso 1 1 calc R . . 
C21 C 0.1281(4) 0.5023(3) 0.4060(3) 0.0309(13) Uani 1 1 d . . . 
H21 H 0.0888 0.5258 0.3787 0.037 Uiso 1 1 calc R . . 
C22 C 0.1227(3) 0.4663(3) 0.4761(3) 0.0300(14) Uani 1 1 d . . . 
H22 H 0.0783 0.4613 0.5036 0.036 Uiso 1 1 calc R . . 
C23 C 0.1965(3) 0.4388(3) 0.4975(4) 0.0333(15) Uani 1 1 d . . . 
H23 H 0.2089 0.4136 0.5417 0.040 Uiso 1 1 calc R . . 
 
loop_ 
 _atom_site_aniso_label 
 _atom_site_aniso_U_11 
 _atom_site_aniso_U_22 
 _atom_site_aniso_U_33 
 _atom_site_aniso_U_23 
 _atom_site_aniso_U_13 
 _atom_site_aniso_U_12 
Os 0.02447(12) 0.01733(11) 0.01940(10) -0.00036(10) 0.00047(10) -0.00027(10) 
P1 0.0310(9) 0.0189(7) 0.0204(7) 0.0016(6) -0.0045(6) -0.0034(6) 
P2 0.0322(10) 0.0335(9) 0.0351(9) 0.0070(7) -0.0001(7) 0.0007(7) 
F1 0.036(2) 0.095(4) 0.100(4) 0.025(3) -0.004(2) 0.021(2) 
F2 0.034(2) 0.079(3) 0.166(6) -0.004(4) 0.001(3) 0.004(2) 
F3 0.070(3) 0.045(3) 0.100(4) -0.004(3) 0.016(3) -0.010(2) 
F4 0.109(4) 0.036(3) 0.172(6) -0.006(3) 0.067(4) -0.006(3) 
F5 0.121(4) 0.113(4) 0.049(3) 0.019(3) 0.021(3) 0.007(3) 
F6 0.131(4) 0.112(4) 0.032(3) 0.007(3) -0.009(3) -0.008(4) 
C1 0.035(3) 0.031(4) 0.021(3) -0.003(3) 0.002(3) 0.010(3) 
C2 0.037(3) 0.028(3) 0.019(3) -0.006(2) -0.004(3) 0.001(3) 
C3 0.028(3) 0.027(3) 0.023(3) -0.001(3) -0.001(3) -0.002(3) 
C4 0.019(3) 0.030(3) 0.029(3) 0.001(2) 0.004(3) -0.002(2) 
C5 0.026(3) 0.035(4) 0.035(4) -0.003(3) -0.001(3) 0.000(3) 
C6 0.040(4) 0.046(5) 0.062(5) -0.007(4) 0.000(4) 0.018(3) 
C7 0.029(4) 0.050(5) 0.076(6) 0.015(4) -0.015(4) 0.007(3) 
C8 0.050(4) 0.045(4) 0.047(4) 0.012(3) -0.021(4) 0.000(3) 
C9 0.037(4) 0.037(4) 0.033(3) -0.006(3) -0.007(3) 0.004(3) 
C10 0.032(3) 0.023(3) 0.024(3) 0.002(3) 0.000(3) 0.002(2) 
C11 0.034(4) 0.032(4) 0.026(3) -0.005(3) 0.004(3) -0.002(3) 
C12 0.037(4) 0.029(3) 0.045(4) -0.002(3) -0.005(3) 0.007(3) 
C13 0.032(3) 0.030(3) 0.031(3) 0.000(3) -0.005(3) -0.012(3) 
C14 0.039(4) 0.062(5) 0.035(4) 0.002(3) 0.003(3) -0.010(3) 
C15 0.056(5) 0.037(4) 0.076(6) 0.011(4) -0.015(4) -0.014(4) 
C16 0.042(4) 0.025(3) 0.027(3) 0.007(3) -0.012(3) -0.004(3) 
C17 0.053(4) 0.054(5) 0.027(3) 0.004(3) -0.009(3) -0.012(4) 
C18 0.070(5) 0.034(4) 0.046(4) 0.011(3) -0.023(4) -0.002(3) 
C19 0.022(3) 0.029(3) 0.062(5) -0.004(3) 0.001(3) -0.004(3) 
C20 0.064(5) 0.022(3) 0.040(4) -0.004(3) 0.022(3) -0.012(3) 
C21 0.044(3) 0.014(3) 0.035(3) -0.003(3) -0.005(3) -0.001(3) 
C22 0.042(4) 0.024(3) 0.024(3) -0.004(3) 0.004(3) -0.001(3) 
C23 0.043(4) 0.017(3) 0.040(4) -0.004(3) -0.016(3) 0.003(3) 
 
_geom_special_details 
; 
 All esds (except the esd in the dihedral angle between two l.s. planes) 
 are estimated using the full covariance matrix.  The cell esds are taken 
 into account individually in the estimation of esds in distances, angles 
 and torsion angles; correlations between esds in cell parameters are only 
 used when they are defined by crystal symmetry.  An approximate (isotropic) 
 treatment of cell esds is used for estimating esds involving l.s. planes. 
; 
 
loop_ 
 _geom_bond_atom_site_label_1 
 _geom_bond_atom_site_label_2 
 _geom_bond_distance 
 _geom_bond_site_symmetry_2 
 _geom_bond_publ_flag 
Os C2 2.186(5) . ? 
Os C1 2.189(6) . ? 
Os C22 2.200(6) . ? 
Os C23 2.207(6) . ? 
Os C19 2.249(6) . ? 
Os C10 2.258(5) . ? 
Os C21 2.261(5) . ? 
Os C20 2.263(6) . ? 
Os C3 2.277(6) . ? 
Os P1 2.3021(14) . ? 
P1 C10 1.759(6) . ? 
P1 C16 1.835(6) . ? 
P1 C13 1.839(5) . ? 
P2 F1 1.554(4) . ? 
P2 F4 1.558(5) . ? 
P2 F6 1.562(5) . ? 
P2 F5 1.570(5) . ? 
P2 F2 1.577(4) . ? 
P2 F3 1.594(4) . ? 
C1 C2 1.422(8) . ? 
C1 H1A 0.84(6) . ? 
C1 H1B 1.01(5) . ? 
C2 C3 1.423(8) . ? 
C2 C11 1.512(8) . ? 
C3 C4 1.512(8) . ? 
C3 H3 0.99(5) . ? 
C4 C5 1.511(7) . ? 
C4 C9 1.512(8) . ? 
C4 H4 0.9800 . ? 
C5 C6 1.509(8) . ? 
C5 H5A 0.9700 . ? 
C5 H5B 0.9700 . ? 
C6 C7 1.500(9) . ? 
C6 H6A 0.9700 . ? 
C6 H6B 0.9700 . ? 
C7 C8 1.521(9) . ? 
C7 H7A 0.9700 . ? 
C7 H7B 0.9700 . ? 
C8 C9 1.544(8) . ? 
C8 H8A 0.9700 . ? 
C8 H8B 0.9700 . ? 
C9 H9A 0.9700 . ? 
C9 H9B 0.9700 . ? 
C10 C11 1.506(8) . ? 
C10 C12 1.510(7) . ? 
C11 H11A 0.83(6) . ? 
C11 H11B 0.88(6) . ? 
C12 H12A 0.9600 . ? 
C12 H12B 0.9600 . ? 
C12 H12C 0.9600 . ? 
C13 C15 1.515(8) . ? 
C13 C14 1.553(8) . ? 
C13 H13 0.9800 . ? 
C14 H14A 0.9600 . ? 
C14 H14B 0.9600 . ? 
C14 H14C 0.9600 . ? 
C15 H15A 0.9600 . ? 
C15 H15B 0.9600 . ? 
C15 H15C 0.9600 . ? 
C16 C18 1.507(8) . ? 
C16 C17 1.529(8) . ? 
C16 H16 0.9800 . ? 
C17 H17A 0.9600 . ? 
C17 H17B 0.9600 . ? 
C17 H17C 0.9600 . ? 
C18 H18A 0.9600 . ? 
C18 H18B 0.9600 . ? 
C18 H18C 0.9600 . ? 
C19 C20 1.385(9) . ? 
C19 C23 1.406(9) . ? 
C19 H19 0.9300 . ? 
C20 C21 1.413(9) . ? 
C20 H20 0.9300 . ? 
C21 C22 1.410(8) . ? 
C21 H21 0.9300 . ? 
C22 C23 1.421(8) . ? 
C22 H22 0.9300 . ? 
C23 H23 0.9300 . ? 
 
loop_ 
 _geom_angle_atom_site_label_1 
 _geom_angle_atom_site_label_2 
 _geom_angle_atom_site_label_3 
 _geom_angle 
 _geom_angle_site_symmetry_1 
 _geom_angle_site_symmetry_3 
 _geom_angle_publ_flag 
C2 Os C1 37.9(2) . . ? 
C2 Os C22 145.8(2) . . ? 
C1 Os C22 136.4(2) . . ? 
C2 Os C23 175.8(2) . . ? 
C1 Os C23 138.7(2) . . ? 
C22 Os C23 37.6(2) . . ? 
C2 Os C19 139.5(2) . . ? 
C1 Os C19 102.2(2) . . ? 
C22 Os C19 61.9(2) . . ? 
C23 Os C19 36.8(2) . . ? 
C2 Os C10 62.9(2) . . ? 
C1 Os C10 77.8(2) . . ? 
C22 Os C10 145.0(2) . . ? 
C23 Os C10 115.3(2) . . ? 
C19 Os C10 111.6(2) . . ? 
C2 Os C21 119.4(2) . . ? 
C1 Os C21 99.6(2) . . ? 
C22 Os C21 36.8(2) . . ? 
C23 Os C21 61.8(2) . . ? 
C19 Os C21 61.5(2) . . ? 
C10 Os C21 172.1(2) . . ? 
C2 Os C20 118.1(2) . . ? 
C1 Os C20 82.8(2) . . ? 
C22 Os C20 60.5(2) . . ? 
C23 Os C20 60.2(2) . . ? 
C19 Os C20 35.8(2) . . ? 
C10 Os C20 135.8(2) . . ? 
C21 Os C20 36.4(2) . . ? 
C2 Os C3 37.1(2) . . ? 
C1 Os C3 65.8(2) . . ? 
C22 Os C3 110.5(2) . . ? 
C23 Os C3 147.0(2) . . ? 
C19 Os C3 154.9(2) . . ? 
C10 Os C3 88.2(2) . . ? 
C21 Os C3 97.6(2) . . ? 
C20 Os C3 119.1(2) . . ? 
C2 Os P1 89.52(16) . . ? 
C1 Os P1 119.40(16) . . ? 
C22 Os P1 103.57(16) . . ? 
C23 Os P1 91.50(16) . . ? 
C19 Os P1 115.33(18) . . ? 
C10 Os P1 45.37(15) . . ? 
C21 Os P1 139.47(17) . . ? 
C20 Os P1 150.16(18) . . ? 
C3 Os P1 89.49(15) . . ? 
C10 P1 C16 111.4(3) . . ? 
C10 P1 C13 117.2(3) . . ? 
C16 P1 C13 112.9(3) . . ? 
C10 P1 Os 65.98(18) . . ? 
C16 P1 Os 118.10(19) . . ? 
C13 P1 Os 122.4(2) . . ? 
F1 P2 F4 91.0(3) . . ? 
F1 P2 F6 89.6(3) . . ? 
F4 P2 F6 91.6(3) . . ? 
F1 P2 F5 92.1(3) . . ? 
F4 P2 F5 90.0(3) . . ? 
F6 P2 F5 177.6(3) . . ? 
F1 P2 F2 178.0(3) . . ? 
F4 P2 F2 89.1(3) . . ? 
F6 P2 F2 92.3(3) . . ? 
F5 P2 F2 85.9(3) . . ? 
F1 P2 F3 91.1(2) . . ? 
F4 P2 F3 177.8(3) . . ? 
F6 P2 F3 88.1(3) . . ? 
F5 P2 F3 90.2(3) . . ? 
F2 P2 F3 88.7(2) . . ? 
C2 C1 Os 70.9(3) . . ? 
C2 C1 H1A 123(4) . . ? 
Os C1 H1A 114(4) . . ? 
C2 C1 H1B 112(3) . . ? 
Os C1 H1B 118(3) . . ? 
H1A C1 H1B 113(5) . . ? 
C1 C2 C3 117.1(5) . . ? 
C1 C2 C11 113.5(5) . . ? 
C3 C2 C11 123.2(5) . . ? 
C1 C2 Os 71.1(3) . . ? 
C3 C2 Os 74.9(3) . . ? 
C11 C2 Os 99.3(4) . . ? 
C2 C3 C4 124.7(5) . . ? 
C2 C3 Os 68.0(3) . . ? 
C4 C3 Os 115.1(4) . . ? 
C2 C3 H3 116(3) . . ? 
C4 C3 H3 112(3) . . ? 
Os C3 H3 114(3) . . ? 
C5 C4 C9 109.9(5) . . ? 
C5 C4 C3 112.2(5) . . ? 
C9 C4 C3 109.7(5) . . ? 
C5 C4 H4 108.3 . . ? 
C9 C4 H4 108.3 . . ? 
C3 C4 H4 108.3 . . ? 
C6 C5 C4 111.0(5) . . ? 
C6 C5 H5A 109.4 . . ? 
C4 C5 H5A 109.4 . . ? 
C6 C5 H5B 109.4 . . ? 
C4 C5 H5B 109.4 . . ? 
H5A C5 H5B 108.0 . . ? 
C7 C6 C5 111.6(6) . . ? 
C7 C6 H6A 109.3 . . ? 
C5 C6 H6A 109.3 . . ? 
C7 C6 H6B 109.3 . . ? 
C5 C6 H6B 109.3 . . ? 
H6A C6 H6B 108.0 . . ? 
C6 C7 C8 112.2(5) . . ? 
C6 C7 H7A 109.2 . . ? 
C8 C7 H7A 109.2 . . ? 
C6 C7 H7B 109.2 . . ? 
C8 C7 H7B 109.2 . . ? 
H7A C7 H7B 107.9 . . ? 
C7 C8 C9 111.1(6) . . ? 
C7 C8 H8A 109.4 . . ? 
C9 C8 H8A 109.4 . . ? 
C7 C8 H8B 109.4 . . ? 
C9 C8 H8B 109.4 . . ? 
H8A C8 H8B 108.0 . . ? 
C4 C9 C8 111.6(5) . . ? 
C4 C9 H9A 109.3 . . ? 
C8 C9 H9A 109.3 . . ? 
C4 C9 H9B 109.3 . . ? 
C8 C9 H9B 109.3 . . ? 
H9A C9 H9B 108.0 . . ? 
C11 C10 C12 119.4(5) . . ? 
C11 C10 P1 114.1(4) . . ? 
C12 C10 P1 124.0(4) . . ? 
C11 C10 Os 96.5(4) . . ? 
C12 C10 Os 118.4(4) . . ? 
P1 C10 Os 68.65(18) . . ? 
C10 C11 C2 100.5(5) . . ? 
C10 C11 H11A 119(4) . . ? 
C2 C11 H11A 105(4) . . ? 
C10 C11 H11B 111(4) . . ? 
C2 C11 H11B 105(4) . . ? 
H11A C11 H11B 114(6) . . ? 
C10 C12 H12A 109.5 . . ? 
C10 C12 H12B 109.5 . . ? 
H12A C12 H12B 109.5 . . ? 
C10 C12 H12C 109.5 . . ? 
H12A C12 H12C 109.5 . . ? 
H12B C12 H12C 109.5 . . ? 
C15 C13 C14 112.5(5) . . ? 
C15 C13 P1 115.3(4) . . ? 
C14 C13 P1 110.9(4) . . ? 
C15 C13 H13 105.8 . . ? 
C14 C13 H13 105.8 . . ? 
P1 C13 H13 105.8 . . ? 
C13 C14 H14A 109.5 . . ? 
C13 C14 H14B 109.5 . . ? 
H14A C14 H14B 109.5 . . ? 
C13 C14 H14C 109.5 . . ? 
H14A C14 H14C 109.5 . . ? 
H14B C14 H14C 109.5 . . ? 
C13 C15 H15A 109.5 . . ? 
C13 C15 H15B 109.5 . . ? 
H15A C15 H15B 109.5 . . ? 
C13 C15 H15C 109.5 . . ? 
H15A C15 H15C 109.5 . . ? 
H15B C15 H15C 109.5 . . ? 
C18 C16 C17 110.8(5) . . ? 
C18 C16 P1 115.7(4) . . ? 
C17 C16 P1 111.1(4) . . ? 
C18 C16 H16 106.2 . . ? 
C17 C16 H16 106.2 . . ? 
P1 C16 H16 106.2 . . ? 
C16 C17 H17A 109.5 . . ? 
C16 C17 H17B 109.5 . . ? 
H17A C17 H17B 109.5 . . ? 
C16 C17 H17C 109.5 . . ? 
H17A C17 H17C 109.5 . . ? 
H17B C17 H17C 109.5 . . ? 
C16 C18 H18A 109.5 . . ? 
C16 C18 H18B 109.5 . . ? 
H18A C18 H18B 109.5 . . ? 
C16 C18 H18C 109.5 . . ? 
H18A C18 H18C 109.5 . . ? 
H18B C18 H18C 109.5 . . ? 
C20 C19 C23 106.8(5) . . ? 
C20 C19 Os 72.6(4) . . ? 
C23 C19 Os 70.0(3) . . ? 
C20 C19 H19 126.6 . . ? 
C23 C19 H19 126.6 . . ? 
Os C19 H19 122.5 . . ? 
C19 C20 C21 110.9(6) . . ? 
C19 C20 Os 71.6(3) . . ? 
C21 C20 Os 71.7(3) . . ? 
C19 C20 H20 124.6 . . ? 
C21 C20 H20 124.6 . . ? 
Os C20 H20 123.7 . . ? 
C22 C21 C20 105.7(5) . . ? 
C22 C21 Os 69.2(3) . . ? 
C20 C21 Os 71.9(3) . . ? 
C22 C21 H21 127.2 . . ? 
C20 C21 H21 127.2 . . ? 
Os C21 H21 123.5 . . ? 
C21 C22 C23 108.4(5) . . ? 
C21 C22 Os 74.0(3) . . ? 
C23 C22 Os 71.5(3) . . ? 
C21 C22 H22 125.8 . . ? 
C23 C22 H22 125.8 . . ? 
Os C22 H22 120.5 . . ? 
C19 C23 C22 108.1(5) . . ? 
C19 C23 Os 73.2(4) . . ? 
C22 C23 Os 70.9(3) . . ? 
C19 C23 H23 125.9 . . ? 
C22 C23 H23 125.9 . . ? 
Os C23 H23 121.6 . . ? 
 
_diffrn_measured_fraction_theta_max    0.922 
_diffrn_reflns_theta_full              27.50 
_diffrn_measured_fraction_theta_full   0.988 
_refine_diff_density_max    3.581 
_refine_diff_density_min   -0.499 
_refine_diff_density_rms    0.159 


#===END
#-----------------------------------------------------------------------------80
# Data for compound 4 (local labelling enrique3n)   
 
 
data_enrique3n 
 
_audit_creation_method            SHELXL-97 
_chemical_name_systematic 
; 
 ? 
; 
_chemical_name_common             ? 
_chemical_melting_point           ? 
_chemical_formula_moiety          ? 
_chemical_formula_sum 
 'C55 H50 B F24 Os P' 
_chemical_formula_weight          1398.93 
 
loop_ 
 _atom_type_symbol 
 _atom_type_description 
 _atom_type_scat_dispersion_real 
 _atom_type_scat_dispersion_imag 
 _atom_type_scat_source 
 'C'  'C'   0.0033   0.0016 
 'International Tables Vol C Tables 4.2.6.8 and 6.1.1.4' 
 'H'  'H'   0.0000   0.0000 
 'International Tables Vol C Tables 4.2.6.8 and 6.1.1.4' 
 'B'  'B'   0.0013   0.0007 
 'International Tables Vol C Tables 4.2.6.8 and 6.1.1.4' 
 'F'  'F'   0.0171   0.0103 
 'International Tables Vol C Tables 4.2.6.8 and 6.1.1.4' 
 'P'  'P'   0.1023   0.0942 
 'International Tables Vol C Tables 4.2.6.8 and 6.1.1.4' 
 'Os'  'Os'  -1.2165   7.6030 
 'International Tables Vol C Tables 4.2.6.8 and 6.1.1.4' 
 
_symmetry_cell_setting            'monoclinic' 
_symmetry_space_group_name_H-M    'P 21/n'
 
loop_ 
 _symmetry_equiv_pos_as_xyz 
 'x, y, z' 
 '-x+1/2, y+1/2, -z+1/2' 
 '-x, -y, -z' 
 'x-1/2, -y-1/2, z-1/2' 
 
_cell_length_a                    19.3084(17) 
_cell_length_b                    16.0356(14) 
_cell_length_c                    19.7029(17) 
_cell_angle_alpha                 90.00 
_cell_angle_beta                  116.6830(10) 
_cell_angle_gamma                 90.00 
_cell_volume                      5450.8(8) 
_cell_formula_units_Z             4 
_cell_measurement_temperature     100(2) 
_cell_measurement_reflns_used     9896 
_cell_measurement_theta_min       2 
_cell_measurement_theta_max       28 
 
_exptl_crystal_description        'irregular block' 
_exptl_crystal_colour             'colourless'
_exptl_crystal_size_max           0.15 
_exptl_crystal_size_mid           0.12 
_exptl_crystal_size_min           0.10 
_exptl_crystal_density_meas       ? 
_exptl_crystal_density_diffrn     1.705 
_exptl_crystal_density_method     'not measured' 
_exptl_crystal_F_000              2768 
_exptl_absorpt_coefficient_mu     2.489 
_exptl_absorpt_correction_type    'multi-scan' 
_exptl_absorpt_correction_T_min   0.716 
_exptl_absorpt_correction_T_max   0.862 
_exptl_absorpt_process_details    
;
Absorption correction performed with SADABS program. This is based on the
method of Blessing: Blessing, R. H., Acta Crystallogr., Sect. A 1995, 51, 33.

SADABS: Area-Detector Absorption Correction. Bruker-AXS 
within SAINT+ v. 7.56a (Bruker AXS, 2008).
;  
 
_diffrn_ambient_temperature       100(2) 
_diffrn_radiation_wavelength      0.71073 
_diffrn_radiation_type            MoK\a 
_diffrn_radiation_source          'fine-focus sealed tube' 
_diffrn_radiation_monochromator   graphite 
_diffrn_measurement_device_type   'Bruker APEX DUO system' 
_diffrn_measurement_method        '\w rotations with narrow frames' 
_diffrn_detector_area_resol_mean  8.26 
_diffrn_standards_decay_%         0 
_diffrn_reflns_number             47466 
_diffrn_reflns_av_R_equivalents   0.0607 
_diffrn_reflns_av_sigmaI/netI     0.0588 
_diffrn_reflns_limit_h_min        -26 
_diffrn_reflns_limit_h_max        26 
_diffrn_reflns_limit_k_min        -20 
_diffrn_reflns_limit_k_max        21 
_diffrn_reflns_limit_l_min        -26 
_diffrn_reflns_limit_l_max        26 
_diffrn_reflns_theta_min          1.23 
_diffrn_reflns_theta_max          29.56 
_reflns_number_total              14103 
_reflns_number_gt                 10523 
_reflns_threshold_expression      >2sigma(I) 
 
_computing_data_collection        'apex2 v. 7.0 (Bruker AXS, 2009)' 
_computing_cell_refinement        'SAINT+ v. 7.56a (Bruker AXS, 2008)' 
_computing_data_reduction         'SAINT+ v. 7.56a (Bruker AXS, 2008)' 
_computing_structure_solution     'SHELXS-97 (Sheldrick, 1990)' 
_computing_structure_refinement   'SHELXL-97 (Sheldrick, 1997)' 
_computing_molecular_graphics     'XP, SHELXTL v. 6.14 (Bruker, 2000)' 
_computing_publication_material   'XCIF, SHELXTL v. 6.14 (Bruker, 2000)'
 
_refine_special_details 
; 
 Refinement of F^2^ against ALL reflections.  The weighted R-factor wR and 
 goodness of fit S are based on F^2^, conventional R-factors R are based 
 on F, with F set to zero for negative F^2^. The threshold expression of 
 F^2^ > 2sigma(F^2^) is used only for calculating R-factors(gt) etc. and is 
 not relevant to the choice of reflections for refinement.  R-factors based 
 on F^2^ are statistically about twice as large as those based on F, and R- 
 factors based on ALL data will be even larger. 
; 
 
_refine_ls_structure_factor_coef  Fsqd  
_refine_ls_matrix_type            full 
_refine_ls_weighting_scheme       calc  
_refine_ls_weighting_details 
 'calc w=1/[\s^2^(Fo^2^)+(0.0494P)^2^+6.2265P] where P=(Fo^2^+2Fc^2^)/3' 
_atom_sites_solution_primary      direct 
_atom_sites_solution_secondary    difmap 
_atom_sites_solution_hydrogens    geom 
_refine_ls_hydrogen_treatment     mixed 
_refine_ls_extinction_method      none 
_refine_ls_extinction_coef        ? 
_refine_ls_number_reflns          14103 
_refine_ls_number_parameters      767 
_refine_ls_number_restraints      50 
_refine_ls_R_factor_all           0.0629 
_refine_ls_R_factor_gt            0.0403 
_refine_ls_wR_factor_ref          0.1021 
_refine_ls_wR_factor_gt           0.0910 
_refine_ls_goodness_of_fit_ref    0.977 
_refine_ls_restrained_S_all       1.008 
_refine_ls_shift/su_max           0.007 
_refine_ls_shift/su_mean          0.000 
 
loop_ 
 _atom_site_label 
 _atom_site_type_symbol 
 _atom_site_fract_x 
 _atom_site_fract_y 
 _atom_site_fract_z 
 _atom_site_U_iso_or_equiv 
 _atom_site_adp_type 
 _atom_site_occupancy 
 _atom_site_symmetry_multiplicity 
 _atom_site_calc_flag 
 _atom_site_refinement_flags 
 _atom_site_disorder_assembly 
 _atom_site_disorder_group 
Os Os 0.286548(9) 0.071853(9) 0.061758(8) 0.02150(5) Uani 1 1 d . . . 
H01 H 0.338(2) 0.135(3) 0.049(2) 0.026 Uiso 1 1 d . . . 
P P 0.27901(6) 0.19341(6) 0.12155(6) 0.0215(2) Uani 1 1 d . . . 
F1 F 0.87717(15) 0.20870(16) 1.24190(13) 0.0341(6) Uani 1 1 d . . . 
F2 F 0.86165(15) 0.09945(17) 1.17390(15) 0.0376(6) Uani 1 1 d . . . 
F3 F 0.80652(16) 0.10721(19) 1.24678(15) 0.0423(7) Uani 1 1 d . . . 
F4A F 0.4837(4) 0.1994(5) 0.9823(4) 0.0382(4) Uiso 0.378(3) 1 d PD A 1 
F5A F 0.5245(4) 0.1870(6) 1.1033(4) 0.0382(4) Uiso 0.378(3) 1 d PD A 1 
F6A F 0.5345(5) 0.0838(3) 1.0394(6) 0.0382(4) Uiso 0.378(3) 1 d PD A 1 
F4B F 0.5380(6) 0.0974(5) 1.0763(6) 0.0382(4) Uiso 0.278(4) 1 d PD A 2 
F5B F 0.4949(5) 0.1611(6) 0.9672(4) 0.0382(4) Uiso 0.278(4) 1 d PD A 2 
F6B F 0.5030(5) 0.2255(5) 1.0656(5) 0.0382(4) Uiso 0.278(4) 1 d PD A 2 
F4C F 0.5243(5) 0.0930(4) 1.0026(5) 0.0382(4) Uiso 0.344(4) 1 d PD A 3 
F5C F 0.4825(4) 0.2174(4) 1.0052(4) 0.0382(4) Uiso 0.344(4) 1 d PD A 3 
F6C F 0.5325(5) 0.1412(6) 1.1057(4) 0.0382(4) Uiso 0.344(4) 1 d PD A 3 
F7A F 0.8726(3) 0.6553(3) 1.2016(3) 0.0382(4) Uiso 0.561(6) 1 d PD B 1 
F8A F 0.9156(3) 0.6055(3) 1.1270(3) 0.0382(4) Uiso 0.561(6) 1 d PD B 1 
F9A F 0.9215(3) 0.5305(3) 1.2203(3) 0.0382(4) Uiso 0.561(6) 1 d PD B 1 
F7B F 0.9096(4) 0.6278(4) 1.1373(4) 0.0382(4) Uiso 0.439(6) 1 d PD B 2 
F8B F 0.8782(4) 0.6225(4) 1.2295(4) 0.0382(4) Uiso 0.439(6) 1 d PD B 2 
F9B F 0.9315(4) 0.5166(4) 1.2030(4) 0.0382(4) Uiso 0.439(6) 1 d PD B 2 
F10 F 0.60094(16) 0.66519(16) 1.09250(16) 0.0422(7) Uani 1 1 d . B . 
F11 F 0.53113(15) 0.58890(17) 0.99601(15) 0.0366(6) Uani 1 1 d . B . 
F12 F 0.56428(15) 0.54329(18) 1.10844(15) 0.0394(6) Uani 1 1 d . B . 
F13 F 0.94199(17) 0.53736(17) 0.93275(16) 0.0440(7) Uani 1 1 d . . . 
F14 F 0.83787(16) 0.52192(17) 0.83111(15) 0.0382(6) Uani 1 1 d . . . 
F15 F 0.9400(2) 0.46043(19) 0.8425(2) 0.0561(9) Uani 1 1 d . . . 
F16A F 0.8936(3) 0.1188(4) 0.9414(5) 0.0382(4) Uiso 0.503(3) 1 d PD C 1 
F17A F 0.9899(4) 0.1697(4) 1.0415(3) 0.0382(4) Uiso 0.503(3) 1 d PD C 1 
F18A F 0.9858(4) 0.1831(5) 0.9300(4) 0.0382(4) Uiso 0.503(3) 1 d PD C 1 
F16B F 0.9107(7) 0.1204(7) 0.9855(9) 0.0382(4) Uiso 0.204(5) 1 d PD C 2 
F17B F 1.0114(6) 0.1977(9) 1.0378(5) 0.0382(4) Uiso 0.204(5) 1 d PD C 2 
F18B F 0.9689(8) 0.1657(10) 0.9199(6) 0.0382(4) Uiso 0.204(5) 1 d PD C 2 
F16C F 0.9540(6) 0.1452(6) 1.0323(4) 0.0382(4) Uiso 0.293(6) 1 d PD C 3 
F17C F 1.0009(5) 0.1832(7) 0.9539(6) 0.0382(4) Uiso 0.293(6) 1 d PD C 3 
F18C F 0.8882(5) 0.1268(6) 0.9143(5) 0.0382(4) Uiso 0.293(6) 1 d PD C 3 
F19 F 0.4874(2) 0.50577(18) 0.65695(16) 0.0619(10) Uani 1 1 d . . . 
F20 F 0.5031(2) 0.56247(19) 0.7611(2) 0.0636(10) Uani 1 1 d . . . 
F21 F 0.59640(19) 0.55883(18) 0.73239(19) 0.0542(8) Uani 1 1 d . . . 
F22 F 0.47382(16) 0.20966(17) 0.66421(14) 0.0436(7) Uani 1 1 d . . . 
F23 F 0.58937(17) 0.16154(18) 0.72215(17) 0.0463(7) Uani 1 1 d . . . 
F24 F 0.51237(18) 0.15037(17) 0.77221(16) 0.0460(7) Uani 1 1 d . . . 
B1 B 0.7160(3) 0.3570(3) 0.9755(2) 0.0185(8) Uani 1 1 d . . . 
C1 C 0.1606(3) 0.0728(3) 0.0138(3) 0.0317(10) Uani 1 1 d . . . 
H1A H 0.144(3) 0.022(3) -0.005(3) 0.038 Uiso 1 1 d . . . 
H1B H 0.141(3) 0.090(3) 0.043(3) 0.038 Uiso 1 1 d . . . 
C2 C 0.1846(3) 0.1261(3) -0.0298(2) 0.0285(9) Uani 1 1 d . . . 
C3 C 0.2238(3) 0.0839(3) -0.0647(2) 0.0288(9) Uani 1 1 d . . . 
H3 H 0.215(3) 0.028(3) -0.079(3) 0.035 Uiso 1 1 d . . . 
C4 C 0.1750(3) 0.2189(3) -0.0280(2) 0.0310(10) Uani 1 1 d . . . 
H4A H 0.121(3) 0.233(3) -0.065(3) 0.037 Uiso 1 1 d . . . 
H4B H 0.210(3) 0.244(3) -0.046(3) 0.037 Uiso 1 1 d . . . 
C5 C 0.1947(3) 0.2487(3) 0.0511(3) 0.0320(10) Uani 1 1 d . . . 
C6 C 0.1529(4) 0.3054(4) 0.0653(4) 0.064(2) Uani 1 1 d . . . 
H6A H 0.113(4) 0.331(4) 0.022(4) 0.077 Uiso 1 1 d . . . 
H6B H 0.163(4) 0.329(4) 0.115(4) 0.077 Uiso 1 1 d . . . 
C7 C 0.2551(3) 0.1235(3) -0.1148(2) 0.0299(10) Uani 1 1 d . . . 
H7 H 0.2754 0.1802 -0.0944 0.036 Uiso 1 1 calc R . . 
C8 C 0.3205(3) 0.0723(3) -0.1166(3) 0.0371(11) Uani 1 1 d . . . 
H8A H 0.3030 0.0138 -0.1295 0.045 Uiso 1 1 calc R . . 
H8B H 0.3652 0.0725 -0.0654 0.045 Uiso 1 1 calc R . . 
C9 C 0.3468(4) 0.1053(4) -0.1740(3) 0.0490(14) Uani 1 1 d . . . 
H9A H 0.3703 0.1612 -0.1580 0.059 Uiso 1 1 calc R . . 
H9B H 0.3867 0.0677 -0.1757 0.059 Uiso 1 1 calc R . . 
C10 C 0.2784(4) 0.1110(3) -0.2526(3) 0.0541(16) Uani 1 1 d . . . 
H10A H 0.2960 0.1341 -0.2888 0.065 Uiso 1 1 calc R . . 
H10B H 0.2575 0.0544 -0.2702 0.065 Uiso 1 1 calc R . . 
C11 C 0.2156(4) 0.1652(3) -0.2516(3) 0.0511(15) Uani 1 1 d . . . 
H11A H 0.1714 0.1667 -0.3030 0.061 Uiso 1 1 calc R . . 
H11B H 0.2354 0.2228 -0.2378 0.061 Uiso 1 1 calc R . . 
C12 C 0.1878(3) 0.1331(3) -0.1948(3) 0.0438(12) Uani 1 1 d . . . 
H12A H 0.1620 0.0784 -0.2122 0.053 Uiso 1 1 calc R . . 
H12B H 0.1492 0.1724 -0.1929 0.053 Uiso 1 1 calc R . . 
C13 C 0.3587(3) 0.2692(3) 0.1492(2) 0.0296(9) Uani 1 1 d . . . 
H13 H 0.3468 0.3153 0.1765 0.036 Uiso 1 1 calc R . . 
C14 C 0.4357(3) 0.2320(3) 0.2052(3) 0.0379(11) Uani 1 1 d . . . 
H14A H 0.4520 0.1897 0.1794 0.057 Uiso 1 1 calc R . . 
H14B H 0.4299 0.2063 0.2474 0.057 Uiso 1 1 calc R . . 
H14C H 0.4749 0.2762 0.2247 0.057 Uiso 1 1 calc R . . 
C15 C 0.3641(3) 0.3089(3) 0.0813(3) 0.0434(12) Uani 1 1 d . . . 
H15A H 0.4071 0.3488 0.0993 0.065 Uiso 1 1 calc R . . 
H15B H 0.3155 0.3379 0.0496 0.065 Uiso 1 1 calc R . . 
H15C H 0.3731 0.2654 0.0512 0.065 Uiso 1 1 calc R . . 
C16 C 0.2695(3) 0.1783(3) 0.2104(2) 0.0295(9) Uani 1 1 d . . . 
H16 H 0.3146 0.1426 0.2434 0.035 Uiso 1 1 calc R . . 
C17 C 0.1983(3) 0.1284(3) 0.1991(3) 0.0419(12) Uani 1 1 d . . . 
H17A H 0.2003 0.1158 0.2486 0.063 Uiso 1 1 calc R . . 
H17B H 0.1970 0.0762 0.1727 0.063 Uiso 1 1 calc R . . 
H17C H 0.1516 0.1609 0.1687 0.063 Uiso 1 1 calc R . . 
C18 C 0.2767(3) 0.2569(3) 0.2574(3) 0.0410(12) Uani 1 1 d . . . 
H18A H 0.2352 0.2960 0.2273 0.062 Uiso 1 1 calc R . . 
H18B H 0.3271 0.2832 0.2713 0.062 Uiso 1 1 calc R . . 
H18C H 0.2725 0.2418 0.3036 0.062 Uiso 1 1 calc R . . 
C19 C 0.2830(3) -0.0649(3) 0.0880(3) 0.0453(13) Uani 1 1 d . . . 
H19 H 0.2361 -0.0954 0.0724 0.054 Uiso 1 1 calc R . . 
C20 C 0.3252(4) -0.0582(3) 0.0474(3) 0.0480(15) Uani 1 1 d . . . 
H20 H 0.3127 -0.0833 -0.0004 0.058 Uiso 1 1 calc R . . 
C21 C 0.3906(3) -0.0075(3) 0.0896(4) 0.0555(17) Uani 1 1 d . . . 
H21 H 0.4298 0.0085 0.0755 0.067 Uiso 1 1 calc R . . 
C22 C 0.3857(3) 0.0150(3) 0.1576(3) 0.0454(13) Uani 1 1 d . . . 
H22 H 0.4218 0.0483 0.1978 0.055 Uiso 1 1 calc R . . 
C23 C 0.3190(3) -0.0204(3) 0.1543(3) 0.0445(13) Uani 1 1 d . . . 
H23 H 0.3010 -0.0149 0.1918 0.053 Uiso 1 1 calc R . . 
C24 C 0.7034(2) 0.2827(2) 1.0259(2) 0.0186(7) Uani 1 1 d . A . 
C25 C 0.7656(2) 0.2495(2) 1.0896(2) 0.0204(8) Uani 1 1 d . . . 
H25 H 0.8165 0.2678 1.1016 0.024 Uiso 1 1 calc R . . 
C26 C 0.7555(2) 0.1900(2) 1.1364(2) 0.0206(8) Uani 1 1 d . . . 
C27 C 0.8248(2) 0.1520(3) 1.2000(2) 0.0268(9) Uani 1 1 d . . . 
C28 C 0.6820(2) 0.1641(2) 1.1224(2) 0.0231(8) Uani 1 1 d . . . 
H28 H 0.6746 0.1246 1.1545 0.028 Uiso 1 1 calc R . . 
C29 C 0.6193(2) 0.1976(2) 1.0601(2) 0.0223(8) Uani 1 1 d . A . 
C30 C 0.5390(2) 0.1666(2) 1.0437(2) 0.0337(10) Uani 1 1 d D . . 
C31 C 0.6296(2) 0.2553(2) 1.0128(2) 0.0218(8) Uani 1 1 d . . . 
H31 H 0.5855 0.2767 0.9704 0.026 Uiso 1 1 calc R A . 
C32 C 0.7223(2) 0.4430(2) 1.0233(2) 0.0189(8) Uani 1 1 d . B . 
C33 C 0.7933(2) 0.4784(3) 1.0724(2) 0.0224(8) Uani 1 1 d . . . 
H33 H 0.8395 0.4543 1.0753 0.027 Uiso 1 1 calc R . . 
C34 C 0.7991(2) 0.5475(3) 1.1174(2) 0.0234(8) Uani 1 1 d . B . 
C35 C 0.8782(2) 0.5820(2) 1.1698(2) 0.0332(10) Uani 1 1 d D . . 
C36 C 0.7330(2) 0.5844(2) 1.1149(2) 0.0235(8) Uani 1 1 d . . . 
H36 H 0.7365 0.6320 1.1449 0.028 Uiso 1 1 calc R B . 
C37 C 0.6622(2) 0.5500(2) 1.0674(2) 0.0205(8) Uani 1 1 d . B . 
C38 C 0.5901(3) 0.5869(3) 1.0660(2) 0.0288(9) Uani 1 1 d . . . 
C39 C 0.6570(2) 0.4805(2) 1.0231(2) 0.0203(8) Uani 1 1 d . . . 
H39 H 0.6074 0.4579 0.9917 0.024 Uiso 1 1 calc R B . 
C40 C 0.7943(2) 0.3455(2) 0.9625(2) 0.0188(7) Uani 1 1 d . C . 
C41 C 0.8177(2) 0.4123(2) 0.9318(2) 0.0213(8) Uani 1 1 d . . . 
H41 H 0.7903 0.4635 0.9230 0.026 Uiso 1 1 calc R . . 
C42 C 0.8793(2) 0.4067(2) 0.9138(2) 0.0227(8) Uani 1 1 d . . . 
C43 C 0.9003(3) 0.4810(3) 0.8805(3) 0.0289(9) Uani 1 1 d . . . 
C44 C 0.9218(2) 0.3332(3) 0.9266(2) 0.0257(9) Uani 1 1 d . . . 
H44 H 0.9646 0.3293 0.9152 0.031 Uiso 1 1 calc R . . 
C45 C 0.8995(2) 0.2660(2) 0.9564(2) 0.0235(8) Uani 1 1 d . C . 
C46 C 0.9423(2) 0.1837(3) 0.9691(2) 0.0395(12) Uani 1 1 d D . . 
C47 C 0.8369(2) 0.2723(2) 0.9736(2) 0.0210(8) Uani 1 1 d . . . 
H47 H 0.8229 0.2248 0.9936 0.025 Uiso 1 1 calc R C . 
C48 C 0.6460(2) 0.3593(2) 0.8884(2) 0.0191(8) Uani 1 1 d . . . 
C49 C 0.6169(2) 0.4330(2) 0.8471(2) 0.0213(8) Uani 1 1 d . . . 
H49 H 0.6340 0.4851 0.8721 0.026 Uiso 1 1 calc R . . 
C50 C 0.5638(2) 0.4322(2) 0.7706(2) 0.0242(8) Uani 1 1 d . . . 
C51 C 0.5373(3) 0.5130(3) 0.7299(3) 0.0350(11) Uani 1 1 d . . . 
C52 C 0.5357(2) 0.3583(2) 0.7321(2) 0.0219(8) Uani 1 1 d . . . 
H52 H 0.4991 0.3582 0.6800 0.026 Uiso 1 1 calc R . . 
C53 C 0.5623(2) 0.2839(2) 0.7716(2) 0.0195(7) Uani 1 1 d . . . 
C54 C 0.5344(3) 0.2024(3) 0.7326(2) 0.0283(9) Uani 1 1 d . . . 
C55 C 0.6166(2) 0.2849(2) 0.8474(2) 0.0196(7) Uani 1 1 d . . . 
H55 H 0.6348 0.2332 0.8728 0.024 Uiso 1 1 calc R . . 
 
loop_ 
 _atom_site_aniso_label 
 _atom_site_aniso_U_11 
 _atom_site_aniso_U_22 
 _atom_site_aniso_U_33 
 _atom_site_aniso_U_23 
 _atom_site_aniso_U_13 
 _atom_site_aniso_U_12 
Os 0.02677(9) 0.01778(8) 0.01910(8) 0.00018(6) 0.00956(6) -0.00037(7) 
P 0.0238(5) 0.0212(5) 0.0199(5) 0.0007(4) 0.0102(4) 0.0022(4) 
F1 0.0308(14) 0.0362(15) 0.0245(13) -0.0013(11) 0.0029(11) -0.0033(11) 
F2 0.0339(15) 0.0343(14) 0.0377(15) 0.0001(12) 0.0101(13) 0.0106(12) 
F3 0.0394(16) 0.0543(18) 0.0288(14) 0.0234(13) 0.0113(13) 0.0004(14) 
F10 0.0357(15) 0.0324(15) 0.0506(17) -0.0173(13) 0.0125(14) 0.0068(12) 
F11 0.0262(14) 0.0447(16) 0.0305(14) -0.0076(11) 0.0052(12) 0.0090(11) 
F12 0.0349(15) 0.0541(17) 0.0378(15) -0.0052(13) 0.0238(13) -0.0012(13) 
F13 0.0450(17) 0.0311(15) 0.0415(16) 0.0030(12) 0.0066(14) -0.0127(13) 
F14 0.0397(16) 0.0393(16) 0.0332(14) 0.0152(12) 0.0140(13) -0.0004(12) 
F15 0.079(2) 0.0401(17) 0.088(2) 0.0138(16) 0.072(2) 0.0092(16) 
F19 0.079(2) 0.0319(16) 0.0296(15) 0.0123(12) -0.0155(15) -0.0071(15) 
F20 0.081(3) 0.0363(18) 0.071(2) 0.0133(15) 0.032(2) 0.0298(17) 
F21 0.057(2) 0.0355(17) 0.055(2) 0.0174(14) 0.0118(17) -0.0113(14) 
F22 0.0459(17) 0.0304(15) 0.0290(14) -0.0075(11) -0.0059(13) -0.0009(12) 
F23 0.0433(17) 0.0372(16) 0.0573(19) -0.0223(14) 0.0215(15) 0.0023(13) 
F24 0.064(2) 0.0284(15) 0.0432(17) -0.0067(12) 0.0218(16) -0.0189(13) 
B1 0.020(2) 0.019(2) 0.016(2) -0.0020(16) 0.0074(18) -0.0003(16) 
C1 0.030(2) 0.032(2) 0.031(2) -0.002(2) 0.011(2) -0.003(2) 
C2 0.030(2) 0.028(2) 0.022(2) 0.0010(17) 0.0064(19) -0.0001(18) 
C3 0.036(3) 0.027(2) 0.021(2) 0.0010(17) 0.0095(19) 0.0004(18) 
C4 0.034(3) 0.029(2) 0.025(2) 0.0031(18) 0.009(2) 0.0105(19) 
C5 0.034(3) 0.031(2) 0.029(2) 0.0012(18) 0.013(2) 0.0074(19) 
C6 0.072(4) 0.063(4) 0.034(3) -0.002(3) 0.003(3) 0.042(3) 
C7 0.045(3) 0.023(2) 0.020(2) 0.0015(16) 0.013(2) -0.0032(19) 
C8 0.050(3) 0.034(3) 0.031(2) -0.001(2) 0.021(2) 0.001(2) 
C9 0.076(4) 0.042(3) 0.042(3) -0.001(2) 0.038(3) -0.002(3) 
C10 0.102(5) 0.037(3) 0.040(3) -0.003(2) 0.046(3) -0.008(3) 
C11 0.082(4) 0.040(3) 0.025(3) 0.010(2) 0.019(3) -0.003(3) 
C12 0.058(3) 0.038(3) 0.026(2) 0.004(2) 0.011(2) -0.003(2) 
C13 0.037(3) 0.025(2) 0.028(2) -0.0042(17) 0.016(2) -0.0060(18) 
C14 0.027(2) 0.032(3) 0.050(3) -0.002(2) 0.013(2) -0.0055(19) 
C15 0.062(4) 0.029(3) 0.048(3) -0.002(2) 0.033(3) -0.014(2) 
C16 0.031(2) 0.034(2) 0.025(2) 0.0034(18) 0.014(2) 0.0045(19) 
C17 0.042(3) 0.056(3) 0.036(3) 0.007(2) 0.024(2) -0.002(2) 
C18 0.053(3) 0.045(3) 0.030(2) 0.001(2) 0.022(2) 0.012(2) 
C19 0.045(3) 0.023(2) 0.062(4) 0.004(2) 0.019(3) 0.004(2) 
C20 0.080(4) 0.032(3) 0.030(3) 0.001(2) 0.023(3) 0.029(3) 
C21 0.055(4) 0.039(3) 0.093(5) 0.038(3) 0.052(4) 0.025(3) 
C22 0.042(3) 0.026(3) 0.039(3) -0.001(2) -0.007(2) 0.009(2) 
C23 0.069(4) 0.032(3) 0.039(3) 0.014(2) 0.031(3) 0.014(3) 
C24 0.0209(19) 0.0197(18) 0.0163(17) -0.0047(14) 0.0093(16) -0.0010(15) 
C25 0.021(2) 0.0221(19) 0.0192(18) -0.0026(15) 0.0098(16) -0.0027(15) 
C26 0.027(2) 0.0199(19) 0.0151(18) -0.0011(14) 0.0096(17) 0.0009(15) 
C27 0.026(2) 0.031(2) 0.021(2) 0.0026(17) 0.0088(18) -0.0031(17) 
C28 0.033(2) 0.0183(19) 0.024(2) 0.0003(15) 0.0182(19) 0.0001(16) 
C29 0.022(2) 0.0202(19) 0.028(2) -0.0021(16) 0.0133(18) -0.0003(15) 
C30 0.030(2) 0.037(3) 0.037(3) 0.008(2) 0.018(2) 0.003(2) 
C31 0.025(2) 0.0196(19) 0.0208(19) -0.0007(15) 0.0108(17) 0.0021(15) 
C32 0.0211(19) 0.0194(19) 0.0163(17) 0.0001(14) 0.0084(16) -0.0016(14) 
C33 0.022(2) 0.026(2) 0.021(2) 0.0012(15) 0.0107(17) 0.0012(16) 
C34 0.024(2) 0.028(2) 0.0162(18) -0.0050(15) 0.0077(17) -0.0054(16) 
C35 0.027(2) 0.036(3) 0.032(2) -0.0110(19) 0.009(2) -0.0021(19) 
C36 0.028(2) 0.022(2) 0.0214(19) -0.0057(15) 0.0124(18) -0.0029(16) 
C37 0.024(2) 0.0188(18) 0.0196(19) -0.0018(14) 0.0112(17) 0.0003(15) 
C38 0.030(2) 0.029(2) 0.027(2) -0.0081(17) 0.0120(19) 0.0019(17) 
C39 0.0192(19) 0.0226(19) 0.0173(18) -0.0021(15) 0.0065(16) -0.0020(15) 
C40 0.0192(19) 0.0216(19) 0.0131(17) -0.0015(14) 0.0051(15) 0.0013(15) 
C41 0.024(2) 0.020(2) 0.0196(19) -0.0021(14) 0.0092(17) 0.0012(15) 
C42 0.025(2) 0.022(2) 0.0203(19) -0.0018(15) 0.0093(17) -0.0020(15) 
C43 0.033(2) 0.026(2) 0.035(2) -0.0001(18) 0.022(2) -0.0002(18) 
C44 0.020(2) 0.031(2) 0.029(2) 0.0003(17) 0.0137(18) 0.0002(17) 
C45 0.024(2) 0.021(2) 0.023(2) 0.0006(15) 0.0079(17) 0.0044(15) 
C46 0.041(3) 0.038(3) 0.049(3) 0.009(2) 0.029(3) 0.013(2) 
C47 0.023(2) 0.0200(19) 0.0182(18) 0.0003(15) 0.0077(16) 0.0004(15) 
C48 0.0171(19) 0.0216(19) 0.0203(19) -0.0002(15) 0.0098(16) 0.0020(14) 
C49 0.024(2) 0.0191(19) 0.0204(19) -0.0032(15) 0.0092(16) -0.0018(15) 
C50 0.023(2) 0.024(2) 0.023(2) 0.0042(16) 0.0074(17) 0.0032(16) 
C51 0.038(3) 0.025(2) 0.026(2) 0.0034(18) 0.000(2) -0.0012(19) 
C52 0.022(2) 0.024(2) 0.0174(19) -0.0020(15) 0.0067(17) -0.0018(15) 
C53 0.0175(19) 0.0217(19) 0.0204(18) 0.0000(15) 0.0094(16) 0.0029(15) 
C54 0.032(2) 0.023(2) 0.023(2) -0.0031(16) 0.0066(19) 0.0003(17) 
C55 0.0199(19) 0.0176(18) 0.0210(19) 0.0016(15) 0.0088(16) 0.0021(15) 
 
_geom_special_details 
; 
 All esds (except the esd in the dihedral angle between two l.s. planes) 
 are estimated using the full covariance matrix.  The cell esds are taken 
 into account individually in the estimation of esds in distances, angles 
 and torsion angles; correlations between esds in cell parameters are only 
 used when they are defined by crystal symmetry.  An approximate (isotropic) 
 treatment of cell esds is used for estimating esds involving l.s. planes. 
; 
 
loop_ 
 _geom_bond_atom_site_label_1 
 _geom_bond_atom_site_label_2 
 _geom_bond_distance 
 _geom_bond_site_symmetry_2 
 _geom_bond_publ_flag 
Os C2 2.167(4) . ? 
Os C1 2.178(5) . ? 
Os C22 2.194(5) . ? 
Os C23 2.209(5) . ? 
Os C21 2.228(5) . ? 
Os C3 2.237(4) . ? 
Os C19 2.260(5) . ? 
Os C20 2.276(4) . ? 
Os P 2.3157(10) . ? 
Os H01 1.51(4) . ? 
P C5 1.827(5) . ? 
P C13 1.840(4) . ? 
P C16 1.857(4) . ? 
F1 C27 1.333(5) . ? 
F2 C27 1.345(5) . ? 
F3 C27 1.335(5) . ? 
F4A C30 1.311(6) . ? 
F5A C30 1.365(6) . ? 
F6A C30 1.332(6) . ? 
F4B C30 1.287(7) . ? 
F5B C30 1.360(7) . ? 
F6B C30 1.354(7) . ? 
F4C C30 1.387(6) . ? 
F5C C30 1.299(6) . ? 
F6C C30 1.347(6) . ? 
F7A C35 1.359(5) . ? 
F8A C35 1.387(6) . ? 
F9A C35 1.274(6) . ? 
F7B C35 1.290(6) . ? 
F8B C35 1.343(6) . ? 
F9B C35 1.408(6) . ? 
F10 C38 1.340(5) . ? 
F11 C38 1.337(5) . ? 
F12 C38 1.345(5) . ? 
F13 C43 1.335(5) . ? 
F14 C43 1.333(5) . ? 
F15 C43 1.332(5) . ? 
F16A C46 1.343(6) . ? 
F17A C46 1.324(6) . ? 
F18A C46 1.370(6) . ? 
F16B C46 1.298(8) . ? 
F17B C46 1.429(8) . ? 
F18B C46 1.316(8) . ? 
F16C C46 1.315(7) . ? 
F17C C46 1.293(7) . ? 
F18C C46 1.440(7) . ? 
F19 C51 1.329(5) . ? 
F20 C51 1.345(6) . ? 
F21 C51 1.340(6) . ? 
F22 C54 1.335(5) . ? 
F23 C54 1.340(5) . ? 
F24 C54 1.335(5) . ? 
B1 C24 1.638(6) . ? 
B1 C48 1.641(6) . ? 
B1 C32 1.642(5) . ? 
B1 C40 1.652(6) . ? 
C1 C2 1.428(6) . ? 
C1 H1A 0.90(5) . ? 
C1 H1B 0.87(5) . ? 
C2 C3 1.405(6) . ? 
C2 C4 1.502(6) . ? 
C3 C7 1.509(6) . ? 
C3 H3 0.93(5) . ? 
C4 C5 1.507(6) . ? 
C4 H4A 1.00(5) . ? 
C4 H4B 0.99(5) . ? 
C5 C6 1.326(7) . ? 
C6 H6A 0.95(7) . ? 
C6 H6B 0.98(7) . ? 
C7 C8 1.521(6) . ? 
C7 C12 1.535(6) . ? 
C7 H7 1.0000 . ? 
C8 C9 1.528(6) . ? 
C8 H8A 0.9900 . ? 
C8 H8B 0.9900 . ? 
C9 C10 1.521(8) . ? 
C9 H9A 0.9900 . ? 
C9 H9B 0.9900 . ? 
C10 C11 1.499(8) . ? 
C10 H10A 0.9900 . ? 
C10 H10B 0.9900 . ? 
C11 C12 1.533(7) . ? 
C11 H11A 0.9900 . ? 
C11 H11B 0.9900 . ? 
C12 H12A 0.9900 . ? 
C12 H12B 0.9900 . ? 
C13 C14 1.520(6) . ? 
C13 C15 1.528(6) . ? 
C13 H13 1.0000 . ? 
C14 H14A 0.9800 . ? 
C14 H14B 0.9800 . ? 
C14 H14C 0.9800 . ? 
C15 H15A 0.9800 . ? 
C15 H15B 0.9800 . ? 
C15 H15C 0.9800 . ? 
C16 C17 1.517(6) . ? 
C16 C18 1.532(6) . ? 
C16 H16 1.0000 . ? 
C17 H17A 0.9800 . ? 
C17 H17B 0.9800 . ? 
C17 H17C 0.9800 . ? 
C18 H18A 0.9800 . ? 
C18 H18B 0.9800 . ? 
C18 H18C 0.9800 . ? 
C19 C23 1.373(8) . ? 
C19 C20 1.379(8) . ? 
C19 H19 0.9500 . ? 
C20 C21 1.415(8) . ? 
C20 H20 0.9500 . ? 
C21 C22 1.432(8) . ? 
C21 H21 0.9500 . ? 
C22 C23 1.382(8) . ? 
C22 H22 0.9500 . ? 
C23 H23 0.9500 . ? 
C24 C25 1.395(5) . ? 
C24 C31 1.400(5) . ? 
C25 C26 1.399(5) . ? 
C25 H25 0.9500 . ? 
C26 C28 1.383(6) . ? 
C26 C27 1.493(6) . ? 
C28 C29 1.388(6) . ? 
C28 H28 0.9500 . ? 
C29 C31 1.390(5) . ? 
C29 C30 1.517(6) . ? 
C31 H31 0.9500 . ? 
C32 C33 1.395(5) . ? 
C32 C39 1.395(5) . ? 
C33 C34 1.392(5) . ? 
C33 H33 0.9500 . ? 
C34 C36 1.386(6) . ? 
C34 C35 1.514(6) . ? 
C36 C37 1.379(6) . ? 
C36 H36 0.9500 . ? 
C37 C39 1.391(5) . ? 
C37 C38 1.502(6) . ? 
C39 H39 0.9500 . ? 
C40 C47 1.394(5) . ? 
C40 C41 1.401(5) . ? 
C41 C42 1.389(5) . ? 
C41 H41 0.9500 . ? 
C42 C44 1.393(6) . ? 
C42 C43 1.499(6) . ? 
C44 C45 1.385(6) . ? 
C44 H44 0.9500 . ? 
C45 C47 1.398(5) . ? 
C45 C46 1.518(6) . ? 
C47 H47 0.9500 . ? 
C48 C49 1.402(5) . ? 
C48 C55 1.409(5) . ? 
C49 C50 1.391(5) . ? 
C49 H49 0.9500 . ? 
C50 C52 1.380(5) . ? 
C50 C51 1.488(6) . ? 
C52 C53 1.390(5) . ? 
C52 H52 0.9500 . ? 
C53 C55 1.387(5) . ? 
C53 C54 1.489(5) . ? 
C55 H55 0.9500 . ? 
 
loop_ 
 _geom_angle_atom_site_label_1 
 _geom_angle_atom_site_label_2 
 _geom_angle_atom_site_label_3 
 _geom_angle 
 _geom_angle_site_symmetry_1 
 _geom_angle_site_symmetry_3 
 _geom_angle_publ_flag 
C2 Os C1 38.39(16) . . ? 
C2 Os C22 176.73(19) . . ? 
C1 Os C22 138.5(2) . . ? 
C2 Os C23 140.40(19) . . ? 
C1 Os C23 102.1(2) . . ? 
C22 Os C23 36.6(2) . . ? 
C2 Os C21 144.6(2) . . ? 
C1 Os C21 144.9(2) . . ? 
C22 Os C21 37.8(2) . . ? 
C23 Os C21 61.64(19) . . ? 
C2 Os C3 37.15(16) . . ? 
C1 Os C3 64.88(17) . . ? 
C22 Os C3 145.24(19) . . ? 
C23 Os C3 142.05(19) . . ? 
C21 Os C3 107.5(2) . . ? 
C2 Os C19 118.02(19) . . ? 
C1 Os C19 87.87(19) . . ? 
C22 Os C19 60.3(2) . . ? 
C23 Os C19 35.8(2) . . ? 
C21 Os C19 60.5(2) . . ? 
C3 Os C19 106.35(19) . . ? 
C2 Os C20 119.40(18) . . ? 
C1 Os C20 108.5(2) . . ? 
C22 Os C20 61.17(19) . . ? 
C23 Os C20 60.11(18) . . ? 
C21 Os C20 36.6(2) . . ? 
C3 Os C20 89.13(17) . . ? 
C19 Os C20 35.4(2) . . ? 
C2 Os P 81.05(12) . . ? 
C1 Os P 84.37(14) . . ? 
C22 Os P 98.14(14) . . ? 
C23 Os P 101.70(14) . . ? 
C21 Os P 127.67(19) . . ? 
C3 Os P 111.57(12) . . ? 
C19 Os P 133.22(16) . . ? 
C20 Os P 159.04(14) . . ? 
C2 Os H01 90.9(16) . . ? 
C1 Os H01 127.9(16) . . ? 
C22 Os H01 91.9(16) . . ? 
C23 Os H01 128.1(16) . . ? 
C21 Os H01 80.3(16) . . ? 
C3 Os H01 80.0(16) . . ? 
C19 Os H01 140.5(16) . . ? 
C20 Os H01 108.1(16) . . ? 
P Os H01 73.8(15) . . ? 
C5 P C13 104.2(2) . . ? 
C5 P C16 110.4(2) . . ? 
C13 P C16 103.3(2) . . ? 
C5 P Os 105.10(15) . . ? 
C13 P Os 118.12(15) . . ? 
C16 P Os 115.15(15) . . ? 
C24 B1 C48 111.9(3) . . ? 
C24 B1 C32 104.8(3) . . ? 
C48 B1 C32 113.3(3) . . ? 
C24 B1 C40 114.1(3) . . ? 
C48 B1 C40 102.8(3) . . ? 
C32 B1 C40 110.2(3) . . ? 
C2 C1 Os 70.4(3) . . ? 
C2 C1 H1A 116(3) . . ? 
Os C1 H1A 107(3) . . ? 
C2 C1 H1B 124(3) . . ? 
Os C1 H1B 116(3) . . ? 
H1A C1 H1B 113(4) . . ? 
C3 C2 C1 113.5(4) . . ? 
C3 C2 C4 126.0(4) . . ? 
C1 C2 C4 120.2(4) . . ? 
C3 C2 Os 74.1(3) . . ? 
C1 C2 Os 71.2(3) . . ? 
C4 C2 Os 117.0(3) . . ? 
C2 C3 C7 125.5(4) . . ? 
C2 C3 Os 68.7(2) . . ? 
C7 C3 Os 126.1(3) . . ? 
C2 C3 H3 123(3) . . ? 
C7 C3 H3 106(3) . . ? 
Os C3 H3 101(3) . . ? 
C2 C4 C5 111.3(4) . . ? 
C2 C4 H4A 107(3) . . ? 
C5 C4 H4A 113(3) . . ? 
C2 C4 H4B 107(3) . . ? 
C5 C4 H4B 111(3) . . ? 
H4A C4 H4B 108(4) . . ? 
C6 C5 C4 122.8(5) . . ? 
C6 C5 P 126.3(4) . . ? 
C4 C5 P 110.8(3) . . ? 
C5 C6 H6A 116(4) . . ? 
C5 C6 H6B 127(4) . . ? 
H6A C6 H6B 117(5) . . ? 
C3 C7 C8 111.7(4) . . ? 
C3 C7 C12 108.1(4) . . ? 
C8 C7 C12 111.1(4) . . ? 
C3 C7 H7 108.7 . . ? 
C8 C7 H7 108.7 . . ? 
C12 C7 H7 108.7 . . ? 
C7 C8 C9 112.7(4) . . ? 
C7 C8 H8A 109.1 . . ? 
C9 C8 H8A 109.1 . . ? 
C7 C8 H8B 109.1 . . ? 
C9 C8 H8B 109.1 . . ? 
H8A C8 H8B 107.8 . . ? 
C10 C9 C8 110.4(5) . . ? 
C10 C9 H9A 109.6 . . ? 
C8 C9 H9A 109.6 . . ? 
C10 C9 H9B 109.6 . . ? 
C8 C9 H9B 109.6 . . ? 
H9A C9 H9B 108.1 . . ? 
C11 C10 C9 111.0(4) . . ? 
C11 C10 H10A 109.4 . . ? 
C9 C10 H10A 109.4 . . ? 
C11 C10 H10B 109.4 . . ? 
C9 C10 H10B 109.4 . . ? 
H10A C10 H10B 108.0 . . ? 
C10 C11 C12 111.4(4) . . ? 
C10 C11 H11A 109.3 . . ? 
C12 C11 H11A 109.3 . . ? 
C10 C11 H11B 109.3 . . ? 
C12 C11 H11B 109.3 . . ? 
H11A C11 H11B 108.0 . . ? 
C11 C12 C7 111.7(5) . . ? 
C11 C12 H12A 109.3 . . ? 
C7 C12 H12A 109.3 . . ? 
C11 C12 H12B 109.3 . . ? 
C7 C12 H12B 109.3 . . ? 
H12A C12 H12B 107.9 . . ? 
C14 C13 C15 111.7(4) . . ? 
C14 C13 P 111.8(3) . . ? 
C15 C13 P 113.1(3) . . ? 
C14 C13 H13 106.6 . . ? 
C15 C13 H13 106.6 . . ? 
P C13 H13 106.6 . . ? 
C13 C14 H14A 109.5 . . ? 
C13 C14 H14B 109.5 . . ? 
H14A C14 H14B 109.5 . . ? 
C13 C14 H14C 109.5 . . ? 
H14A C14 H14C 109.5 . . ? 
H14B C14 H14C 109.5 . . ? 
C13 C15 H15A 109.5 . . ? 
C13 C15 H15B 109.5 . . ? 
H15A C15 H15B 109.5 . . ? 
C13 C15 H15C 109.5 . . ? 
H15A C15 H15C 109.5 . . ? 
H15B C15 H15C 109.5 . . ? 
C17 C16 C18 110.7(4) . . ? 
C17 C16 P 113.4(3) . . ? 
C18 C16 P 116.1(3) . . ? 
C17 C16 H16 105.2 . . ? 
C18 C16 H16 105.2 . . ? 
P C16 H16 105.2 . . ? 
C16 C17 H17A 109.5 . . ? 
C16 C17 H17B 109.5 . . ? 
H17A C17 H17B 109.5 . . ? 
C16 C17 H17C 109.5 . . ? 
H17A C17 H17C 109.5 . . ? 
H17B C17 H17C 109.5 . . ? 
C16 C18 H18A 109.5 . . ? 
C16 C18 H18B 109.5 . . ? 
H18A C18 H18B 109.5 . . ? 
C16 C18 H18C 109.5 . . ? 
H18A C18 H18C 109.5 . . ? 
H18B C18 H18C 109.5 . . ? 
C23 C19 C20 109.5(5) . . ? 
C23 C19 Os 70.1(3) . . ? 
C20 C19 Os 72.9(3) . . ? 
C23 C19 H19 125.3 . . ? 
C20 C19 H19 125.3 . . ? 
Os C19 H19 123.3 . . ? 
C19 C20 C21 108.0(5) . . ? 
C19 C20 Os 71.7(3) . . ? 
C21 C20 Os 69.9(3) . . ? 
C19 C20 H20 126.0 . . ? 
C21 C20 H20 126.0 . . ? 
Os C20 H20 124.0 . . ? 
C20 C21 C22 106.1(5) . . ? 
C20 C21 Os 73.5(3) . . ? 
C22 C21 Os 69.8(3) . . ? 
C20 C21 H21 127.0 . . ? 
C22 C21 H21 127.0 . . ? 
Os C21 H21 121.5 . . ? 
C23 C22 C21 107.8(5) . . ? 
C23 C22 Os 72.3(3) . . ? 
C21 C22 Os 72.4(3) . . ? 
C23 C22 H22 126.1 . . ? 
C21 C22 H22 126.1 . . ? 
Os C22 H22 121.0 . . ? 
C19 C23 C22 108.7(5) . . ? 
C19 C23 Os 74.1(3) . . ? 
C22 C23 Os 71.1(3) . . ? 
C19 C23 H23 125.7 . . ? 
C22 C23 H23 125.7 . . ? 
Os C23 H23 120.8 . . ? 
C25 C24 C31 116.0(3) . . ? 
C25 C24 B1 121.4(3) . . ? 
C31 C24 B1 122.2(3) . . ? 
C24 C25 C26 122.3(4) . . ? 
C24 C25 H25 118.8 . . ? 
C26 C25 H25 118.8 . . ? 
C28 C26 C25 120.5(4) . . ? 
C28 C26 C27 119.9(3) . . ? 
C25 C26 C27 119.6(4) . . ? 
F1 C27 F3 107.6(3) . . ? 
F1 C27 F2 106.3(3) . . ? 
F3 C27 F2 106.0(4) . . ? 
F1 C27 C26 112.7(3) . . ? 
F3 C27 C26 112.5(3) . . ? 
F2 C27 C26 111.3(3) . . ? 
C26 C28 C29 118.0(4) . . ? 
C26 C28 H28 121.0 . . ? 
C29 C28 H28 121.0 . . ? 
C28 C29 C31 121.3(4) . . ? 
C28 C29 C30 117.6(3) . . ? 
C31 C29 C30 121.0(4) . . ? 
F4B C30 F5C 129.4(7) . . ? 
F4B C30 F4A 128.1(7) . . ? 
F5C C30 F4A 24.1(4) . . ? 
F4B C30 F6A 32.5(4) . . ? 
F5C C30 F6A 125.1(6) . . ? 
F4A C30 F6A 109.8(5) . . ? 
F4B C30 F6C 42.0(5) . . ? 
F5C C30 F6C 108.9(5) . . ? 
F4A C30 F6C 126.1(6) . . ? 
F6A C30 F6C 74.0(5) . . ? 
F4B C30 F6B 108.5(6) . . ? 
F5C C30 F6B 48.0(5) . . ? 
F4A C30 F6B 72.1(5) . . ? 
F6A C30 F6B 133.5(6) . . ? 
F6C C30 F6B 69.6(5) . . ? 
F4B C30 F5B 110.8(6) . . ? 
F5C C30 F5B 56.6(5) . . ? 
F4A C30 F5B 32.7(4) . . ? 
F6A C30 F5B 82.8(5) . . ? 
F6C C30 F5B 135.9(6) . . ? 
F6B C30 F5B 104.0(5) . . ? 
F4B C30 F5A 73.8(5) . . ? 
F5C C30 F5A 84.8(5) . . ? 
F4A C30 F5A 107.5(5) . . ? 
F6A C30 F5A 105.1(5) . . ? 
F6C C30 F5A 32.0(4) . . ? 
F6B C30 F5A 39.1(4) . . ? 
F5B C30 F5A 134.4(6) . . ? 
F4B C30 F4C 60.8(5) . . ? 
F5C C30 F4C 107.1(5) . . ? 
F4A C30 F4C 86.2(5) . . ? 
F6A C30 F4C 28.7(4) . . ? 
F6C C30 F4C 101.1(5) . . ? 
F6B C30 F4C 141.3(6) . . ? 
F5B C30 F4C 55.7(5) . . ? 
F5A C30 F4C 129.7(5) . . ? 
F4B C30 C29 114.8(5) . . ? 
F5C C30 C29 115.4(5) . . ? 
F4A C30 C29 113.4(5) . . ? 
F6A C30 C29 111.8(5) . . ? 
F6C C30 C29 114.1(5) . . ? 
F6B C30 C29 109.0(5) . . ? 
F5B C30 C29 109.2(5) . . ? 
F5A C30 C29 108.9(4) . . ? 
F4C C30 C29 108.9(4) . . ? 
C29 C31 C24 121.7(4) . . ? 
C29 C31 H31 119.1 . . ? 
C24 C31 H31 119.1 . . ? 
C33 C32 C39 115.5(3) . . ? 
C33 C32 B1 122.4(3) . . ? 
C39 C32 B1 121.8(3) . . ? 
C34 C33 C32 122.6(4) . . ? 
C34 C33 H33 118.7 . . ? 
C32 C33 H33 118.7 . . ? 
C36 C34 C33 120.5(4) . . ? 
C36 C34 C35 119.9(3) . . ? 
C33 C34 C35 119.6(4) . . ? 
F9A C35 F7B 117.8(5) . . ? 
F9A C35 F8B 83.6(4) . . ? 
F7B C35 F8B 110.1(5) . . ? 
F9A C35 F7A 111.2(4) . . ? 
F7B C35 F7A 83.6(4) . . ? 
F8B C35 F7A 31.4(3) . . ? 
F9A C35 F8A 108.2(4) . . ? 
F7B C35 F8A 19.0(3) . . ? 
F8B C35 F8A 127.4(5) . . ? 
F7A C35 F8A 102.5(4) . . ? 
F9A C35 F9B 21.3(3) . . ? 
F7B C35 F9B 104.2(4) . . ? 
F8B C35 F9B 104.0(4) . . ? 
F7A C35 F9B 128.5(5) . . ? 
F8A C35 F9B 90.7(4) . . ? 
F9A C35 C34 113.8(4) . . ? 
F7B C35 C34 115.1(5) . . ? 
F8B C35 C34 112.2(4) . . ? 
F7A C35 C34 111.5(4) . . ? 
F8A C35 C34 108.9(4) . . ? 
F9B C35 C34 110.4(4) . . ? 
C37 C36 C34 118.0(4) . . ? 
C37 C36 H36 121.0 . . ? 
C34 C36 H36 121.0 . . ? 
C36 C37 C39 121.0(4) . . ? 
C36 C37 C38 119.0(3) . . ? 
C39 C37 C38 119.9(4) . . ? 
F11 C38 F10 106.9(3) . . ? 
F11 C38 F12 105.8(4) . . ? 
F10 C38 F12 106.4(3) . . ? 
F11 C38 C37 112.4(3) . . ? 
F10 C38 C37 112.3(4) . . ? 
F12 C38 C37 112.5(4) . . ? 
C37 C39 C32 122.3(4) . . ? 
C37 C39 H39 118.9 . . ? 
C32 C39 H39 118.9 . . ? 
C47 C40 C41 115.4(3) . . ? 
C47 C40 B1 125.9(3) . . ? 
C41 C40 B1 118.5(3) . . ? 
C42 C41 C40 122.8(4) . . ? 
C42 C41 H41 118.6 . . ? 
C40 C41 H41 118.6 . . ? 
C41 C42 C44 120.6(4) . . ? 
C41 C42 C43 119.4(4) . . ? 
C44 C42 C43 119.9(4) . . ? 
F15 C43 F14 105.8(4) . . ? 
F15 C43 F13 107.5(4) . . ? 
F14 C43 F13 105.3(3) . . ? 
F15 C43 C42 112.7(4) . . ? 
F14 C43 C42 112.2(3) . . ? 
F13 C43 C42 112.8(4) . . ? 
C45 C44 C42 117.8(4) . . ? 
C45 C44 H44 121.1 . . ? 
C42 C44 H44 121.1 . . ? 
C44 C45 C47 120.9(4) . . ? 
C44 C45 C46 119.8(3) . . ? 
C47 C45 C46 119.2(4) . . ? 
F17C C46 F16B 127.7(8) . . ? 
F17C C46 F16C 114.8(6) . . ? 
F16B C46 F16C 45.3(6) . . ? 
F17C C46 F18B 32.6(6) . . ? 
F16B C46 F18B 113.3(7) . . ? 
F16C C46 F18B 129.5(9) . . ? 
F17C C46 F17A 89.6(5) . . ? 
F16B C46 F17A 77.0(6) . . ? 
F16C C46 F17A 32.8(4) . . ? 
F18B C46 F17A 116.5(8) . . ? 
F17C C46 F16A 115.4(6) . . ? 
F16B C46 F16A 34.2(6) . . ? 
F16C C46 F16A 79.1(5) . . ? 
F18B C46 F16A 88.0(6) . . ? 
F17A C46 F16A 109.1(4) . . ? 
F17C C46 F18A 18.2(5) . . ? 
F16B C46 F18A 127.6(7) . . ? 
F16C C46 F18A 129.8(6) . . ? 
F18B C46 F18A 17.3(6) . . ? 
F17A C46 F18A 107.5(5) . . ? 
F16A C46 F18A 105.2(4) . . ? 
F17C C46 F17B 71.3(6) . . ? 
F16B C46 F17B 103.3(6) . . ? 
F16C C46 F17B 59.1(6) . . ? 
F18B C46 F17B 103.1(7) . . ? 
F17A C46 F17B 26.4(5) . . ? 
F16A C46 F17B 133.8(6) . . ? 
F18A C46 F17B 89.3(6) . . ? 
F17C C46 F18C 103.8(6) . . ? 
F16B C46 F18C 55.1(7) . . ? 
F16C C46 F18C 99.8(5) . . ? 
F18B C46 F18C 72.6(7) . . ? 
F17A C46 F18C 128.3(5) . . ? 
F16A C46 F18C 20.9(4) . . ? 
F18A C46 F18C 89.8(5) . . ? 
F17B C46 F18C 149.8(7) . . ? 
F17C C46 C45 115.8(6) . . ? 
F16B C46 C45 116.0(6) . . ? 
F16C C46 C45 114.4(5) . . ? 
F18B C46 C45 115.6(8) . . ? 
F17A C46 C45 112.8(4) . . ? 
F16A C46 C45 112.1(4) . . ? 
F18A C46 C45 109.8(4) . . ? 
F17B C46 C45 103.1(6) . . ? 
F18C C46 C45 105.6(5) . . ? 
C40 C47 C45 122.4(4) . . ? 
C40 C47 H47 118.8 . . ? 
C45 C47 H47 118.8 . . ? 
C49 C48 C55 115.4(3) . . ? 
C49 C48 B1 123.6(3) . . ? 
C55 C48 B1 120.7(3) . . ? 
C50 C49 C48 122.0(4) . . ? 
C50 C49 H49 119.0 . . ? 
C48 C49 H49 119.0 . . ? 
C52 C50 C49 121.3(4) . . ? 
C52 C50 C51 119.8(4) . . ? 
C49 C50 C51 118.9(4) . . ? 
F19 C51 F21 106.1(4) . . ? 
F19 C51 F20 106.3(4) . . ? 
F21 C51 F20 104.2(4) . . ? 
F19 C51 C50 114.4(4) . . ? 
F21 C51 C50 112.2(4) . . ? 
F20 C51 C50 112.8(4) . . ? 
C50 C52 C53 118.3(4) . . ? 
C50 C52 H52 120.9 . . ? 
C53 C52 H52 120.9 . . ? 
C55 C53 C52 120.3(4) . . ? 
C55 C53 C54 119.2(3) . . ? 
C52 C53 C54 120.4(4) . . ? 
F24 C54 F22 106.2(4) . . ? 
F24 C54 F23 105.5(4) . . ? 
F22 C54 F23 106.4(3) . . ? 
F24 C54 C53 112.6(3) . . ? 
F22 C54 C53 113.2(3) . . ? 
F23 C54 C53 112.4(4) . . ? 
C53 C55 C48 122.8(4) . . ? 
C53 C55 H55 118.6 . . ? 
C48 C55 H55 118.6 . . ? 
 
_diffrn_measured_fraction_theta_max    0.924 
_diffrn_reflns_theta_full              27.50 
_diffrn_measured_fraction_theta_full   0.998 
_refine_diff_density_max    1.640 
_refine_diff_density_min   -0.850 
_refine_diff_density_rms    0.122 


#===END
